# Supplementary material for: Two Horizontally Transferred Xenobiotic Resistance Gene Clusters Associated with Detoxification of Benzoxazolinones by Fusarium Species
Source: PubMed Central journal article supplement (PMC4726666; doi:10.1371/journal.pone.0147486), 2016-01-25
Supplement: pone.0147486.s010.pdf [file pone.0147486.s010.pdf]

- 1 **S1 Table. Microarray analysis of *F. verticillioides* increased gene expression in response to**
- 2 **BOA exposure identified the *FDB1* and *FDB2* gene clusters.<sup>a</sup>**

| <b>FVEG Locus</b> | <b>Putative function based on BLASTP and conserved domain searches</b> | <b>Avg Fold Change</b> |
|-------------------|------------------------------------------------------------------------|------------------------|
| FVEG_05718        | Major facilitator superfamily transporter                              | 7.9                    |
| FVEG_05719        | M20 Peptidase beta-alanine synthase, an amidohydrolase                 | 5.5                    |
| FVEG_07606        | Acyl coenzyme A transferase                                            | 3.1                    |
| FVEG_07761        | Sugar porter subfamily of the major facilitator superfamily            | 3.8                    |
| FVEG_07762        | Beta-glucosidase-related glycosidase                                   | 3.2                    |
| FVEG_13837        | Benzyl alcohol dehydrogenase                                           | 0.9                    |
| FVEG_13838        | Zn(II)2Cys6 transcription factor                                       | 1.1                    |
| FVEG_08287        | NmrA-like family                                                       | 3.0                    |
| FVEG_08288        | Major facilitator superfamily transporter                              | 5.2                    |
| FVEG_08289        | Amidase                                                                | 23.3                   |
| FVEG_08290        | Dienelactone hydrolase                                                 | 37.9                   |
| FVEG_08291        | Metallo- $\beta$ -lactamase superfamily                                | 12.9                   |
| FVEG_08292        | Amino acid transporter                                                 | 42.6                   |
| FVEG_08293        | Salicylate hydroxylase                                                 | 9.8                    |
| FVEG_08294        | Zn(II)2Cys6 transcription factor                                       | 4.4                    |
| FVEG_08295        | Amidase                                                                | 21.5                   |
| FVEG_08296        | Major facilitator superfamily transporter                              | 1.2                    |
| FVEG_08297        | Cation efflux family                                                   | 1.0                    |
| FVEG_08792        | SRR1-like protein possibly involved in circadian regulation            | 3.3                    |
| FVEG_09100        | Extradiol ring-cleavage dioxygenase class III enzyme subunit B         | 3.5                    |
| FVEG_12624        | Hypothetical protein                                                   | 1.0                    |
| FVEG_12625        | Dienelactone hydrolase                                                 | 4.9                    |
| FVEG_12626        | Major facilitator superfamily transporter                              | 1.0                    |
| FVEG_12627        | Hypothetical protein                                                   | 0.9                    |
| FVEG_12628        | 3-Hydroxylacyl-CoA dehydrogenase                                       | 2.2                    |
| FVEG_12629        | CoA-transferase family III (CaiB/BaiF)                                 | 8.1                    |
| FVEG_12630        | Salicylate hydroxylase                                                 | 1.6                    |
| FVEG_12631        | Amidase                                                                | 1.0                    |
| FVEG_12632        |                                                                        | 1.0                    |
| FVEG_12633        | Malonyl-CoA synthetase                                                 | 14.0                   |
| FVEG_12634        | Carboxylesterase                                                       | 10.0                   |
| FVEG_12635        | Zn(II)2Cys6 transcription factor                                       | 5.5                    |
| FVEG_12636        | Arylamine N-acetyltransferase (NAT1)                                   | 20.3                   |
| FVEG_12637        | Metallo- $\beta$ -lactamase superfamily                                | 1.9                    |
| FVEG_12638        | Aldo/keto reductase                                                    | 20.4                   |
| FVEG_12639        | Alpha/beta hydrolase; lipase                                           | 9.5                    |
| FVEG_12640        | Amino acid transporter                                                 | 8.9                    |
| FVEG_12641        | Phthalate dioxygenase reductase                                        | 26.5                   |

|            |                                        |      |
|------------|----------------------------------------|------|
| FVEG_12642 | NmrA-like family                       | 1.0  |
| FVEG_13748 | Amino acid permease                    | 2.7  |
| FVEG_13749 | Copper amine oxidase                   | 4.5  |
| FVEG_14165 | CoA-transferase family III (CaiB/BaiF) | 11.9 |

3 <sup>a</sup> Of the 28 genes having  $\geq 3$ -fold increase in expression, 9 were in *FDB1* (FVEG\_08287 to  
4 08295) and 10 were in *FDB2* (FVEG\_12625 to 12641). Both clusters are shaded grey, with  
5 uninduced genes flanking the clusters included for comparative purposes. Note that  
6 FVEG\_12631 and 12632 were reannotated and designated FVEG\_17313, as indicated in Figure  
7 2. Also, a gap exists in the available sequence of chromosome 10 between FVEG\_13838 and  
8 FVEG\_08287, which are on different contigs, thus we assume these two genes are directly  
9 adjacent to each other.

10
